# Supplementary figures and images for: High infectiousness immediately before COVID-19 symptom onset highlights the importance of continued contact tracing
Source: eLife journal article supplement (doi:10.7554/elife.65534), 2021-04-26

**A.**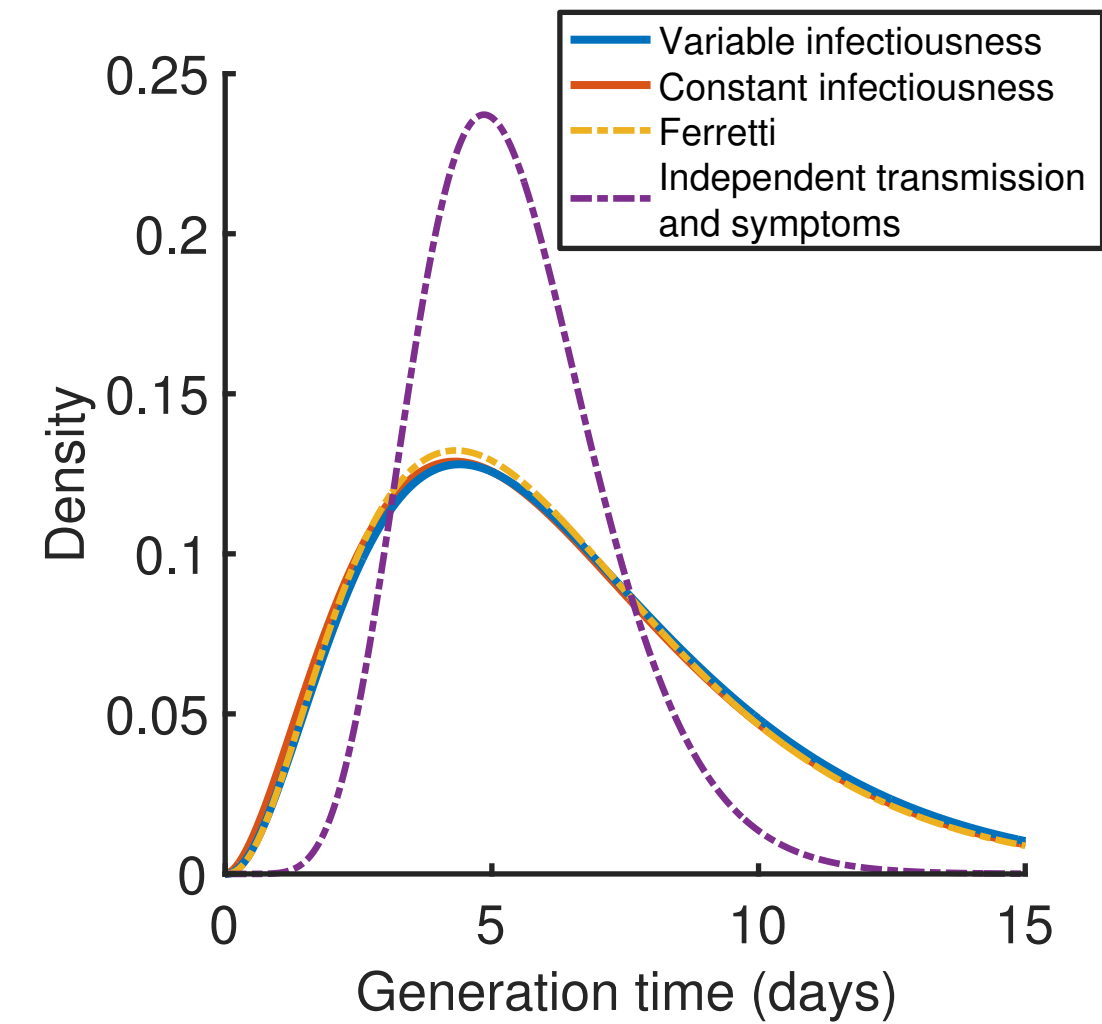**B.**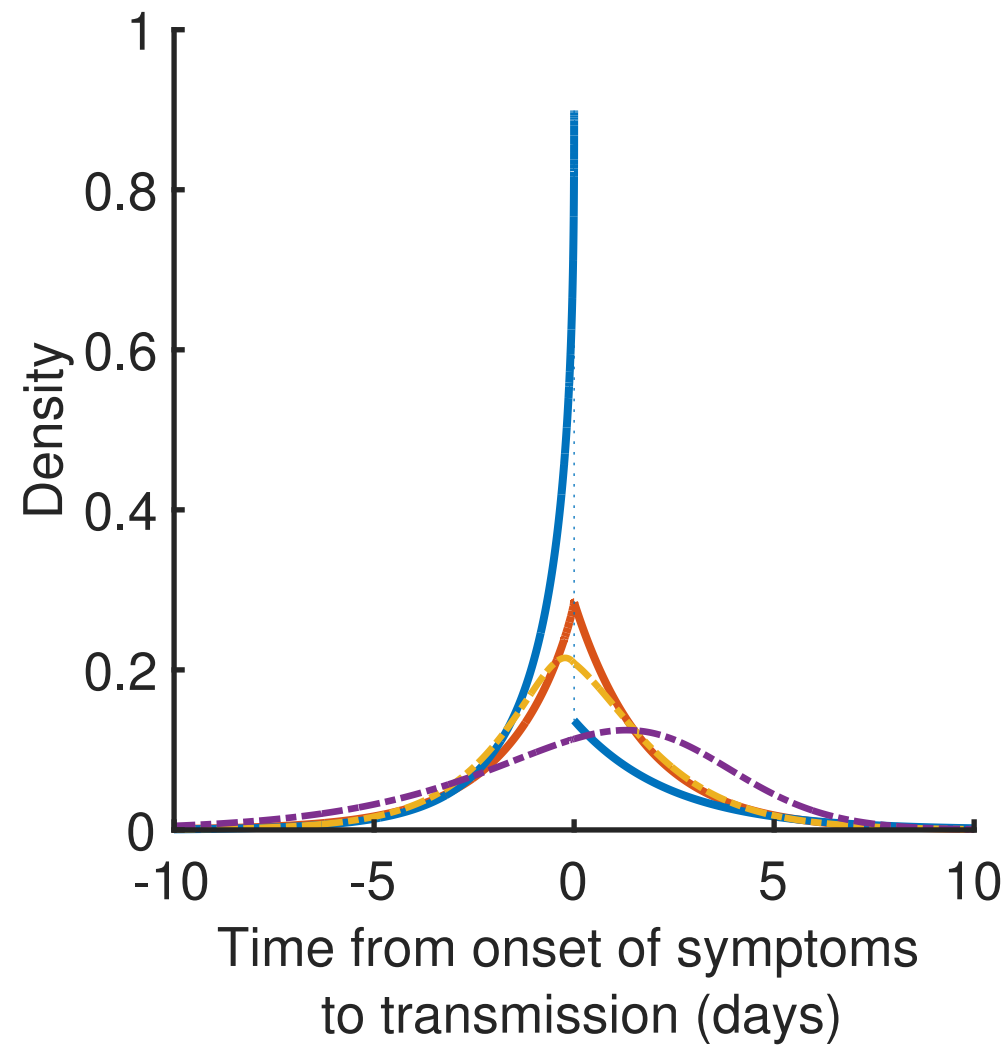**C.**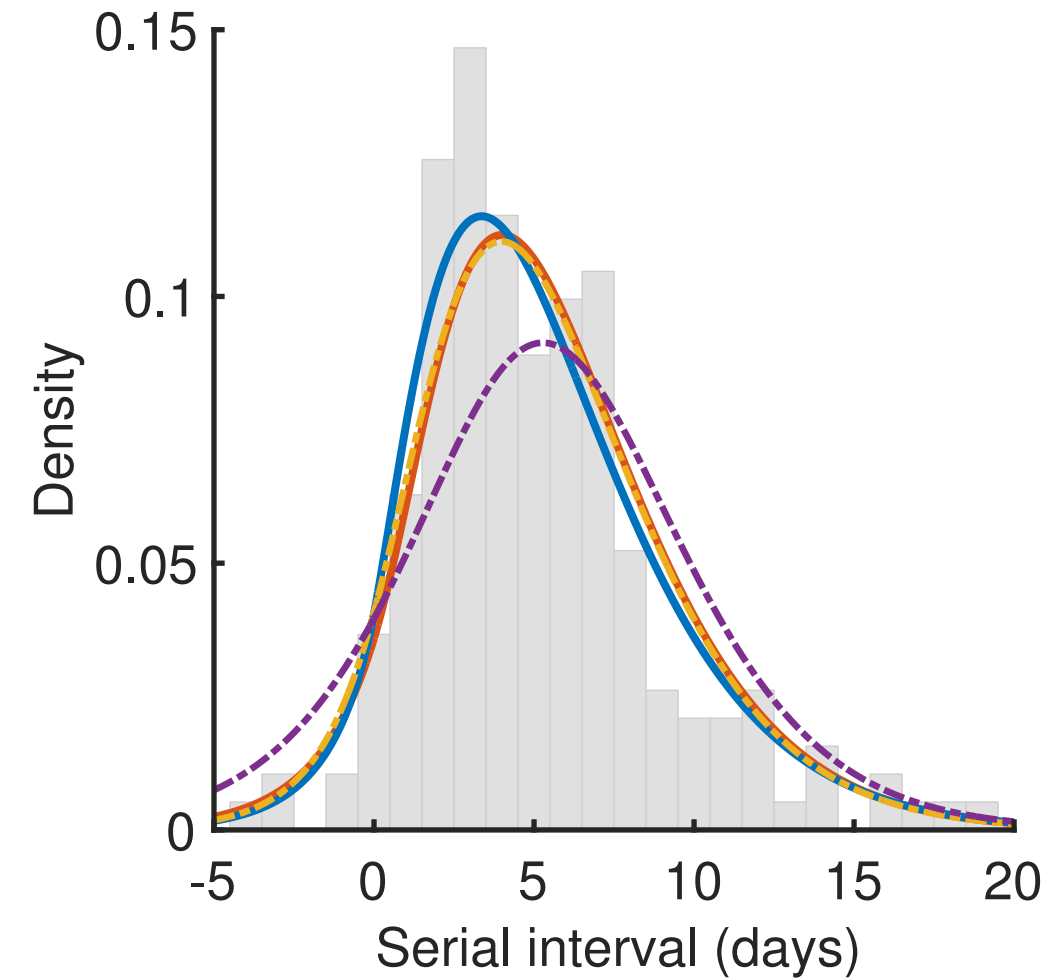

Supplement: supp [file elife-65534-supp-v1.zip]

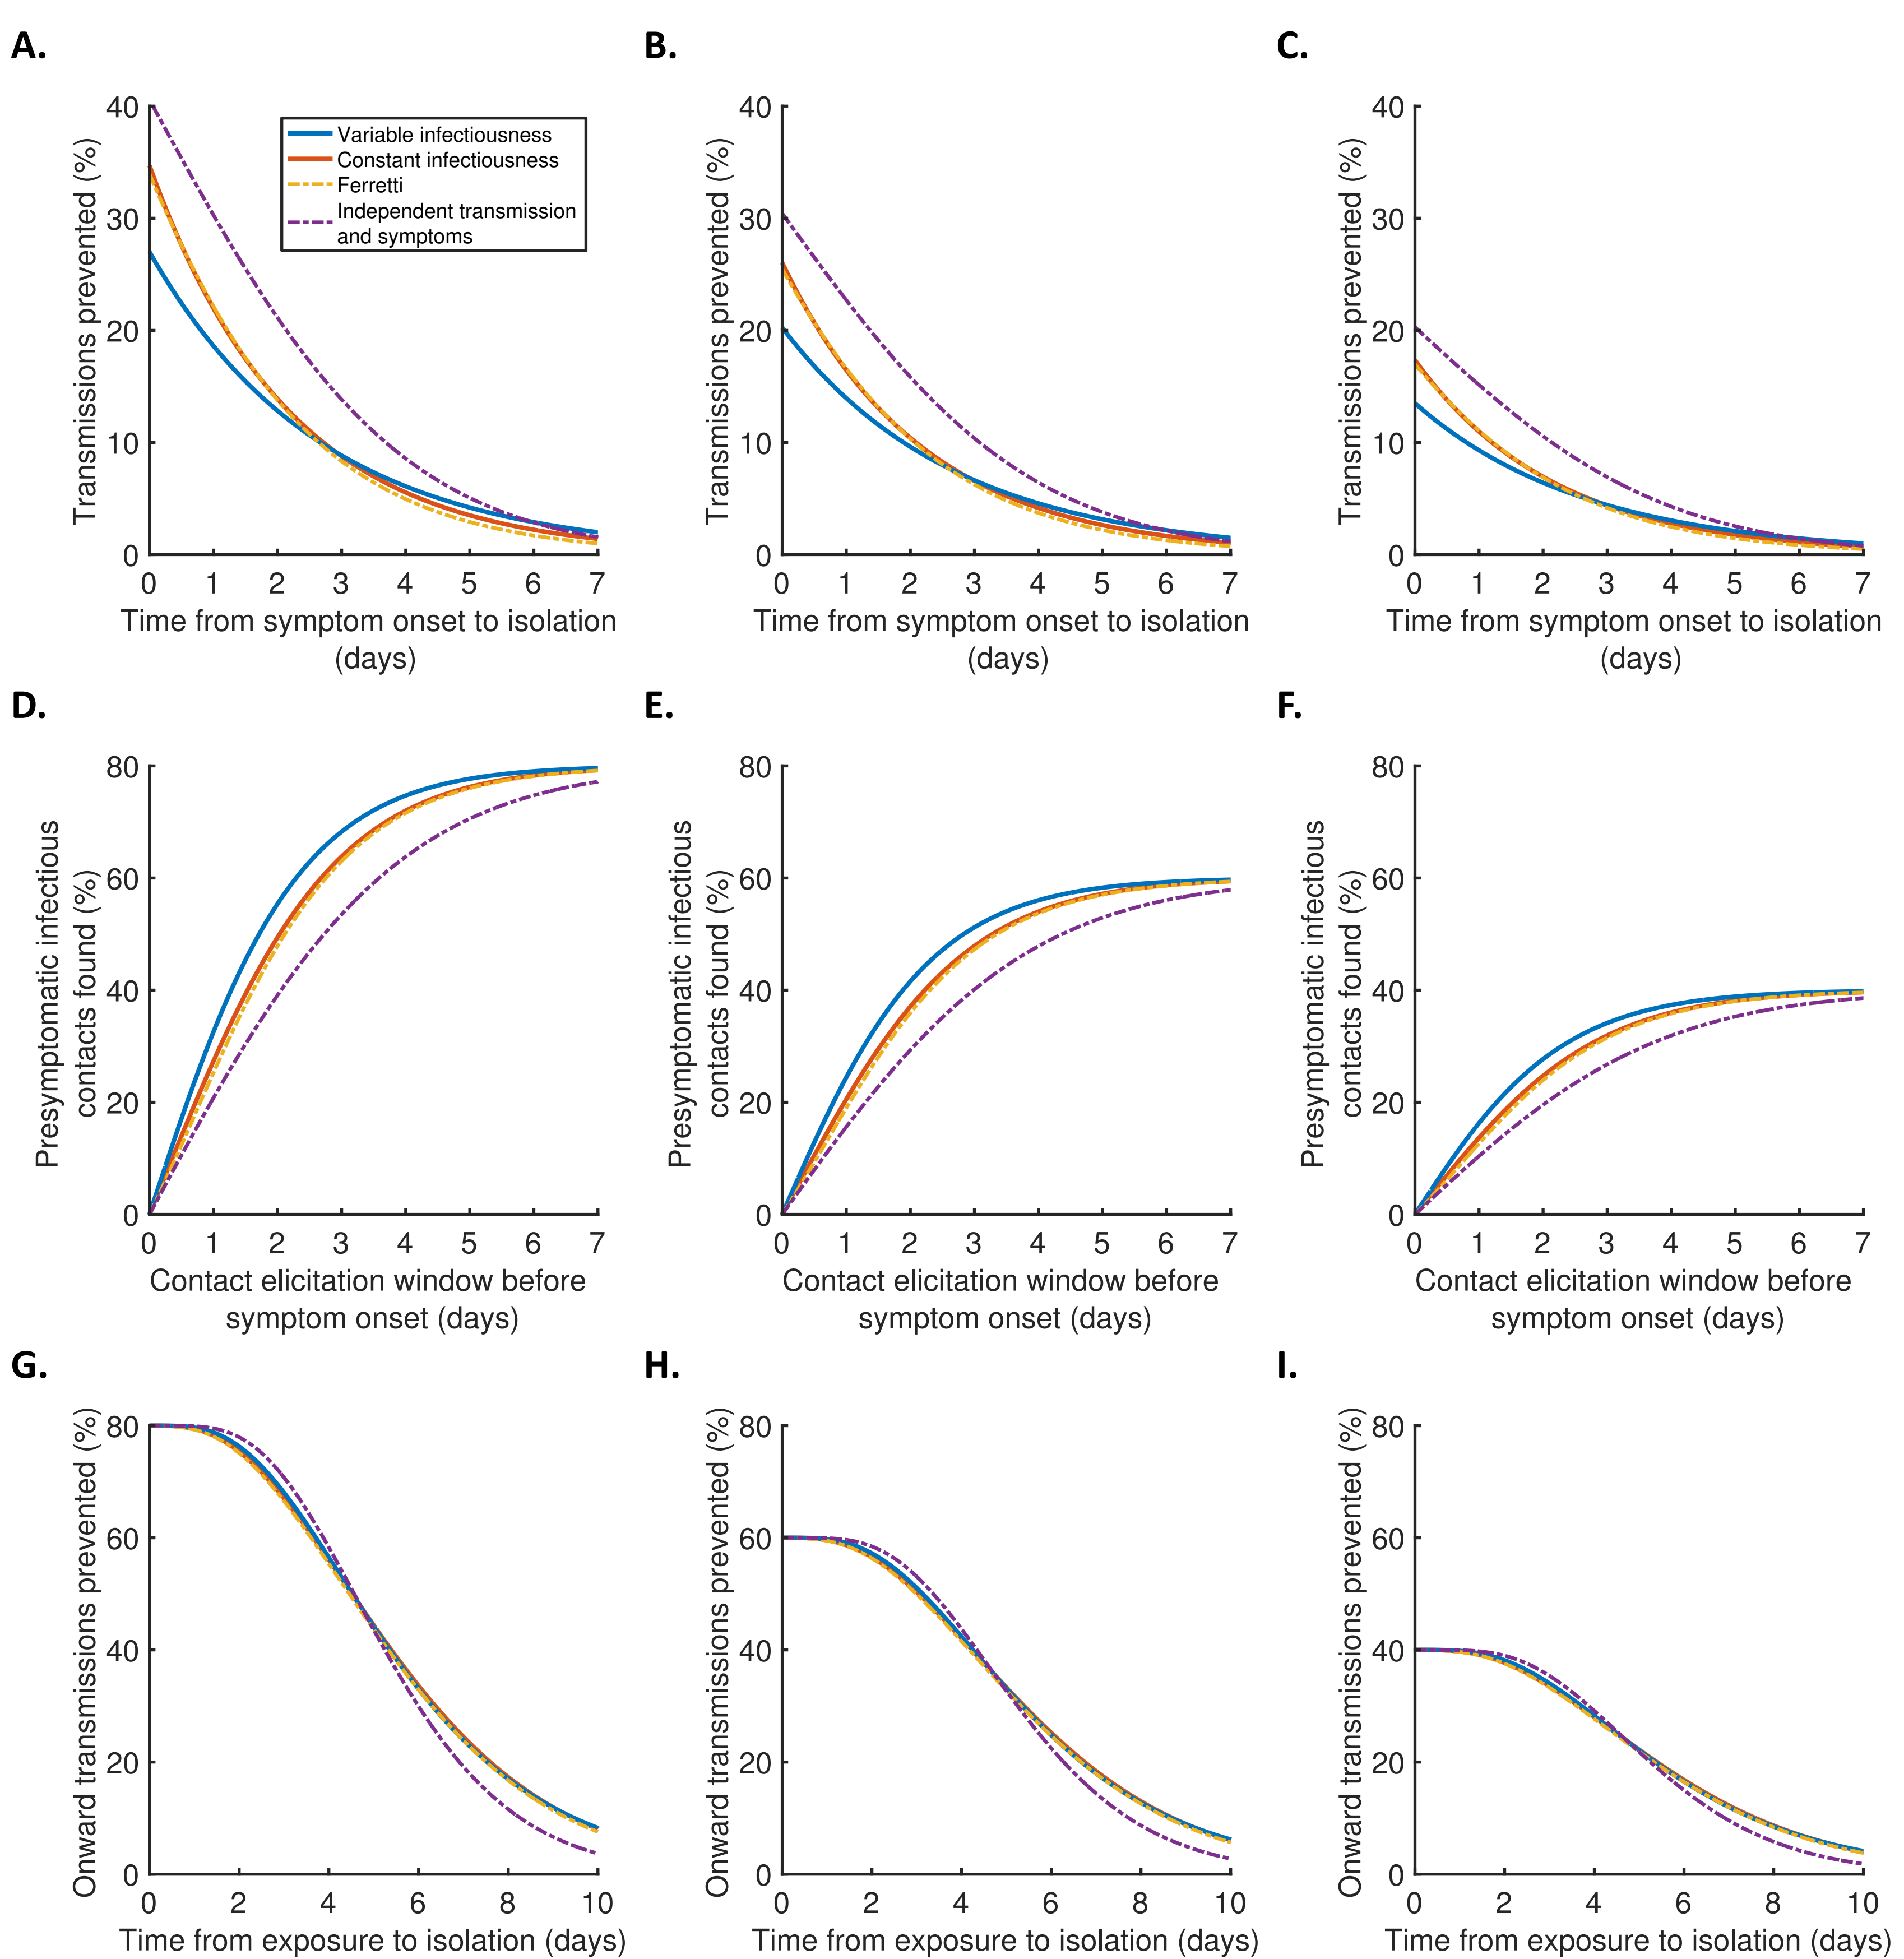

Supplement: supp [file elife-65534-supp-v1.zip]

**A.**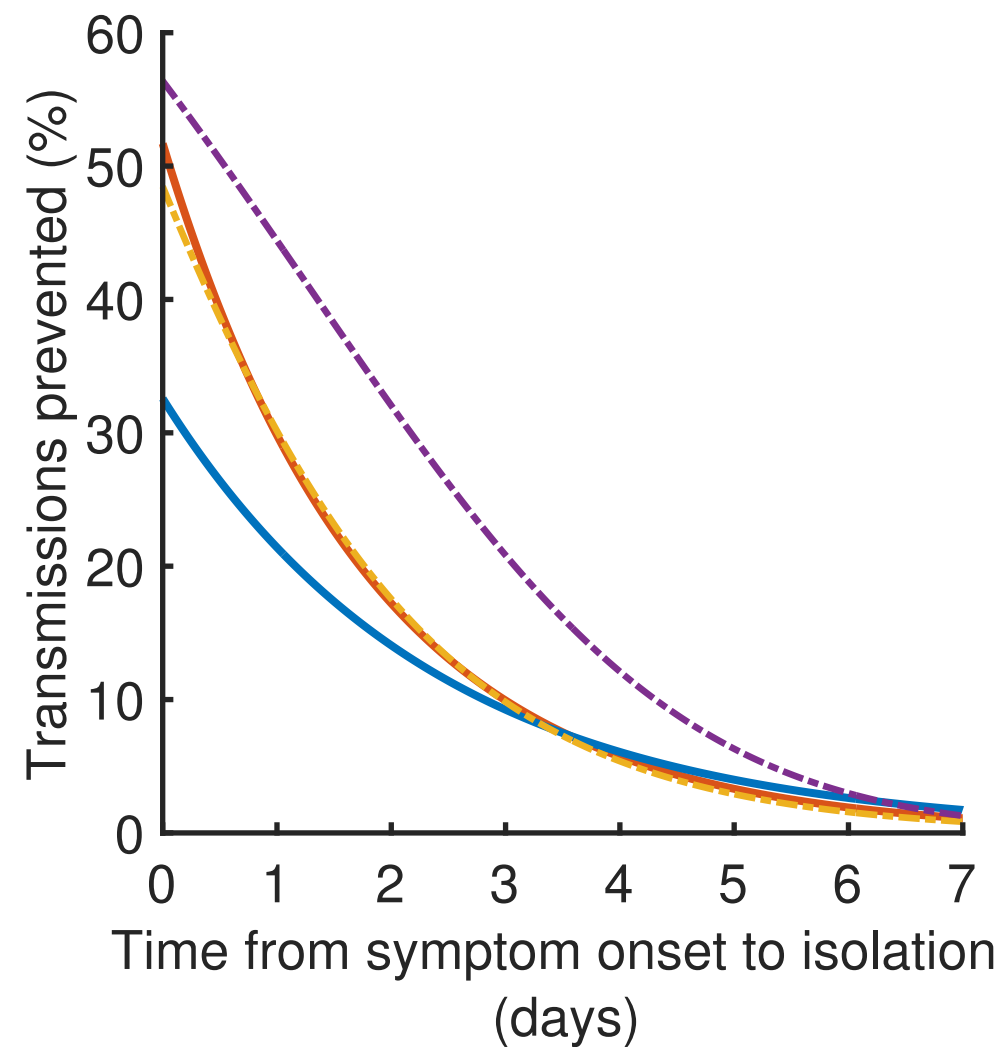**B.**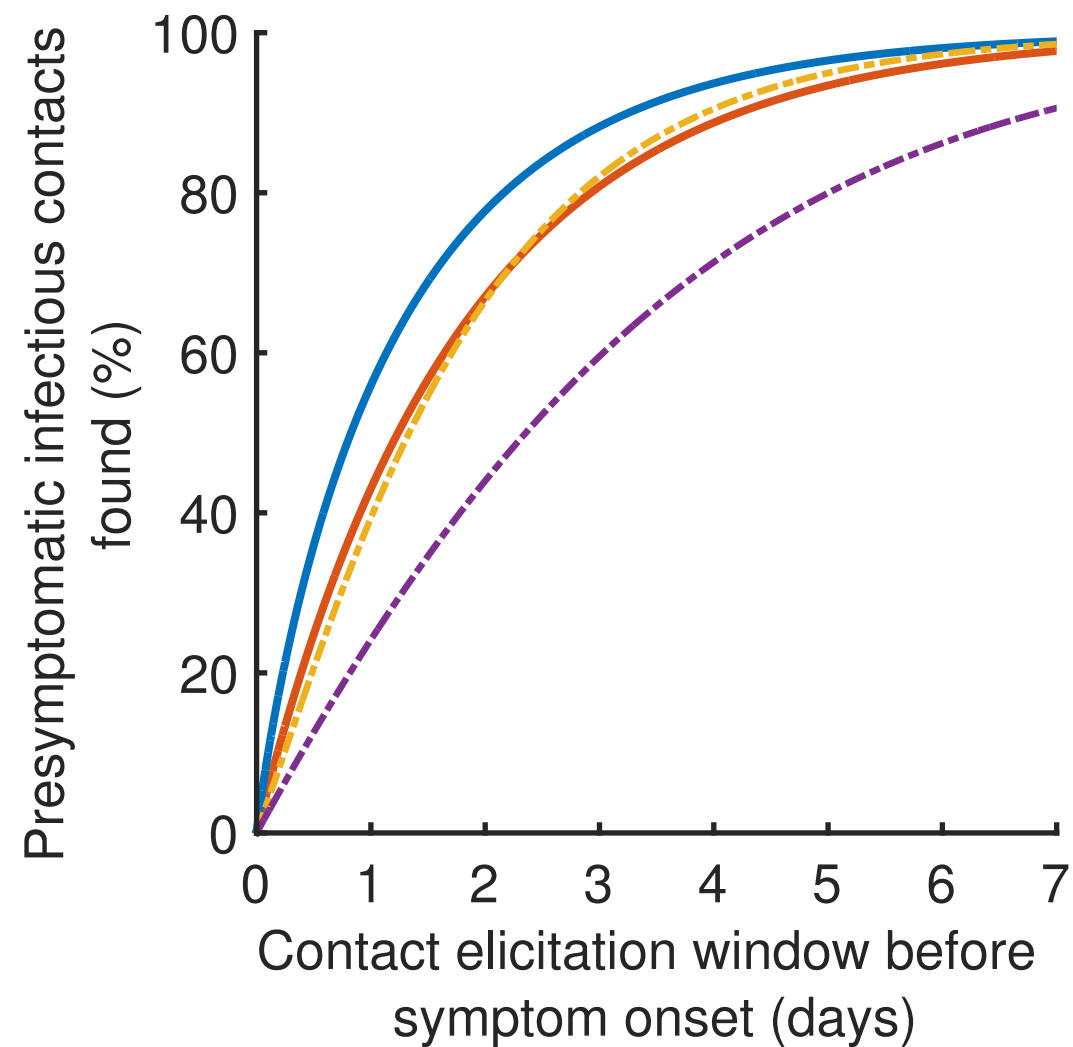**C.**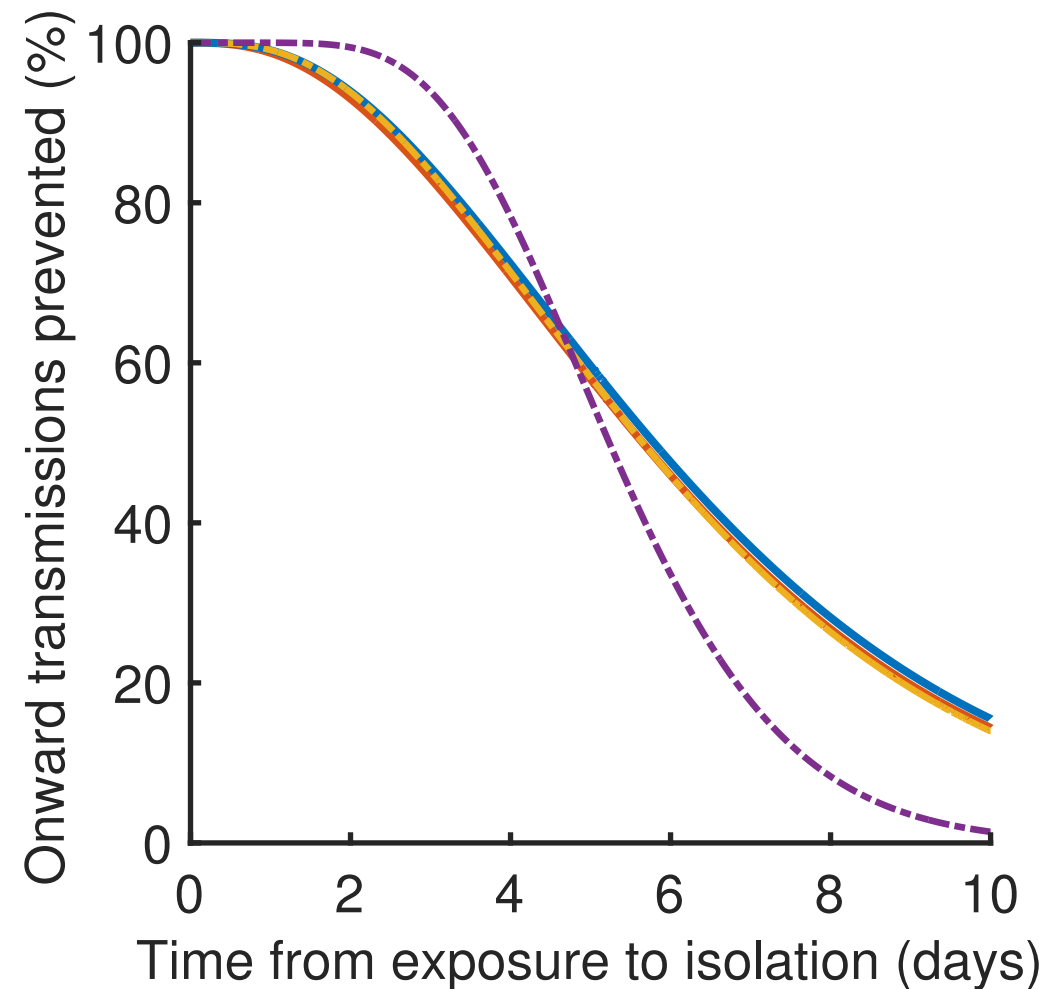

Supplement: supp [file elife-65534-supp-v1.zip]

**A.**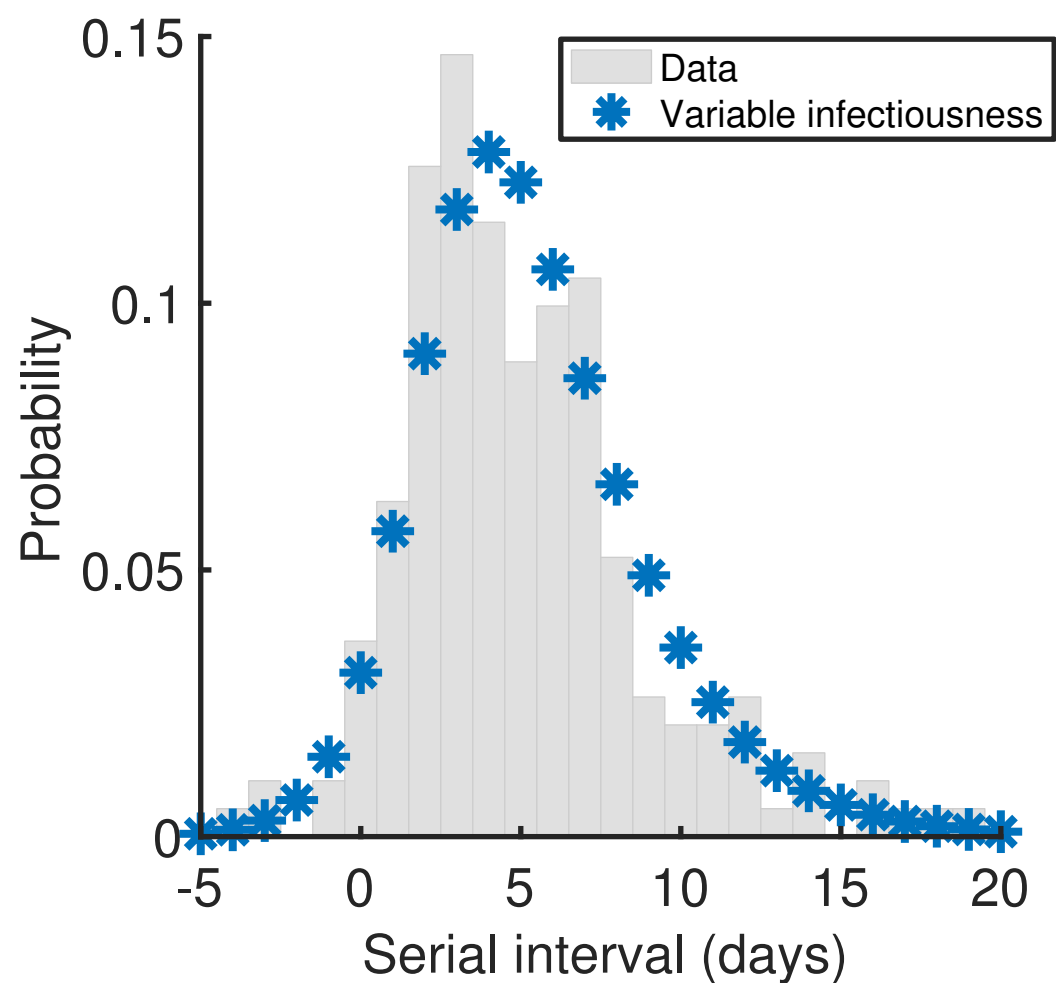**B.**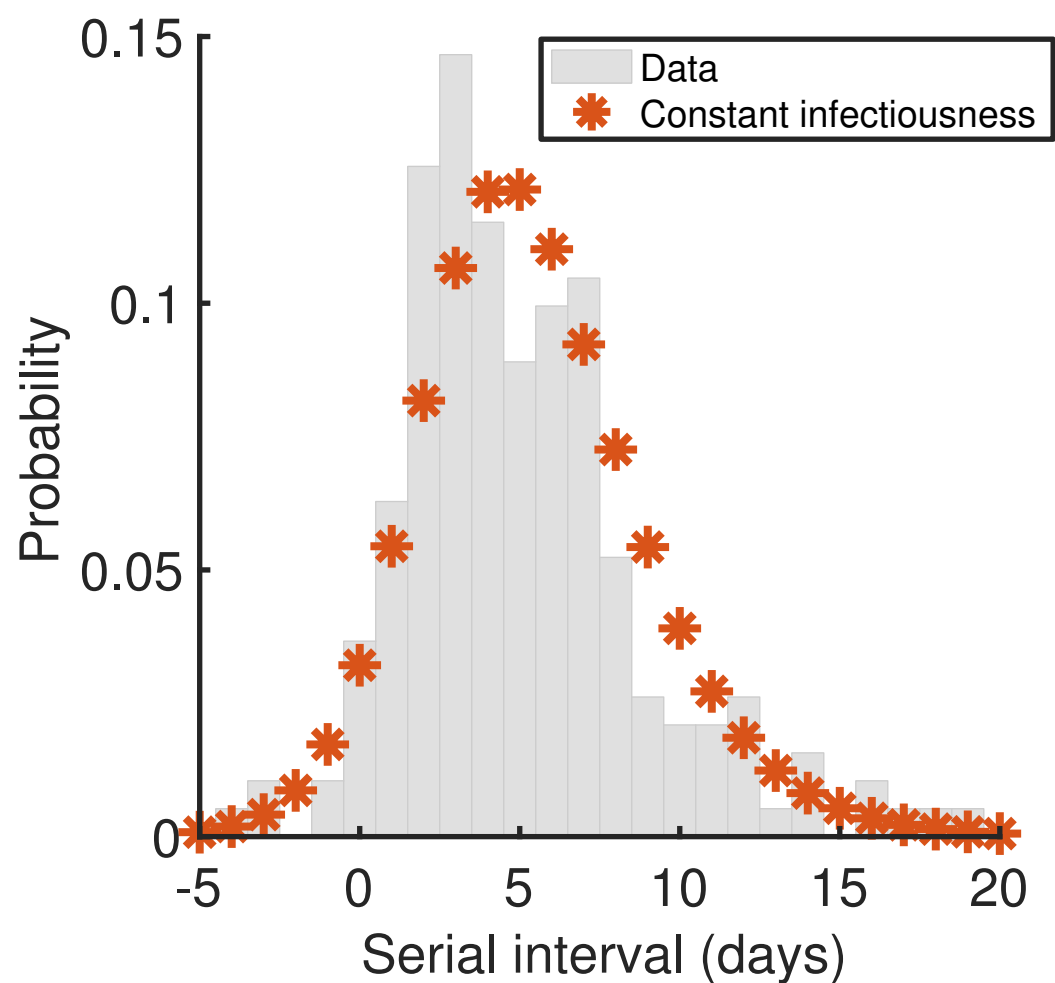**A.**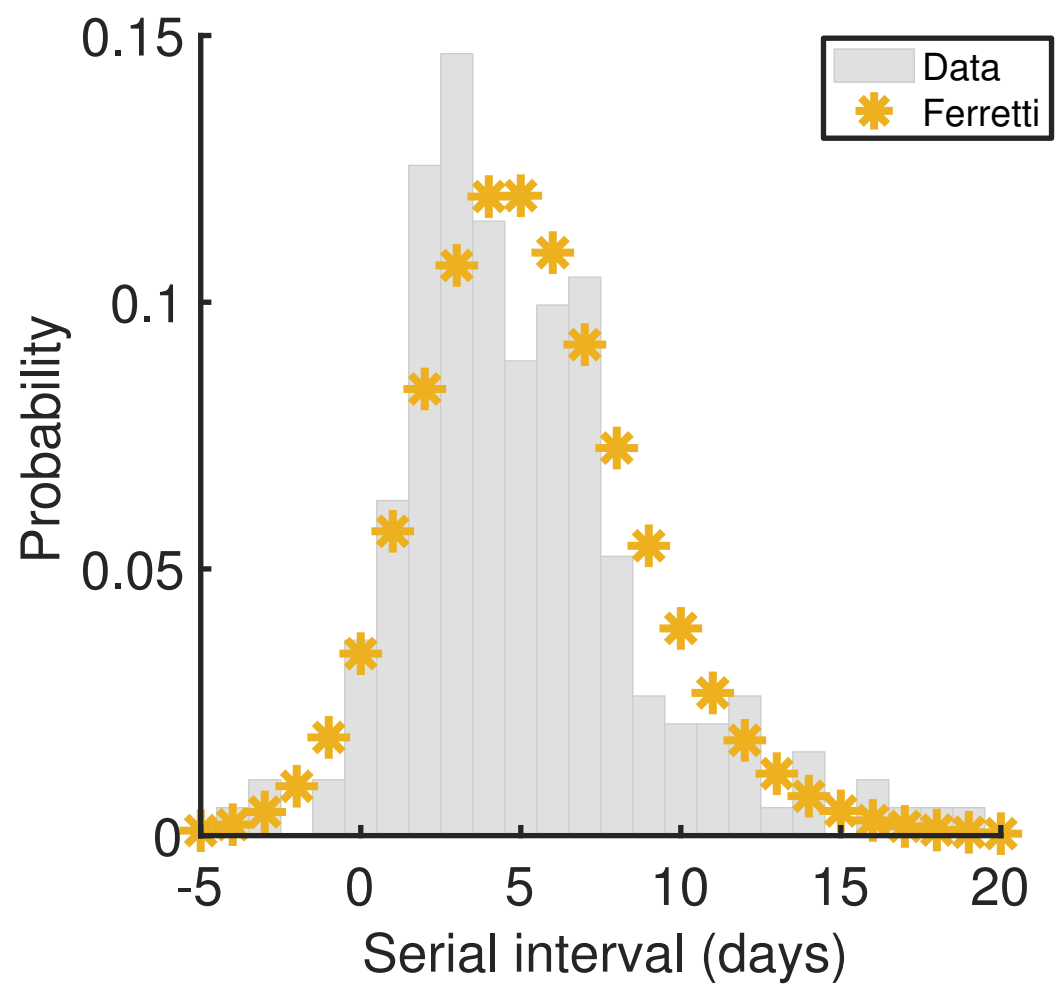**B.**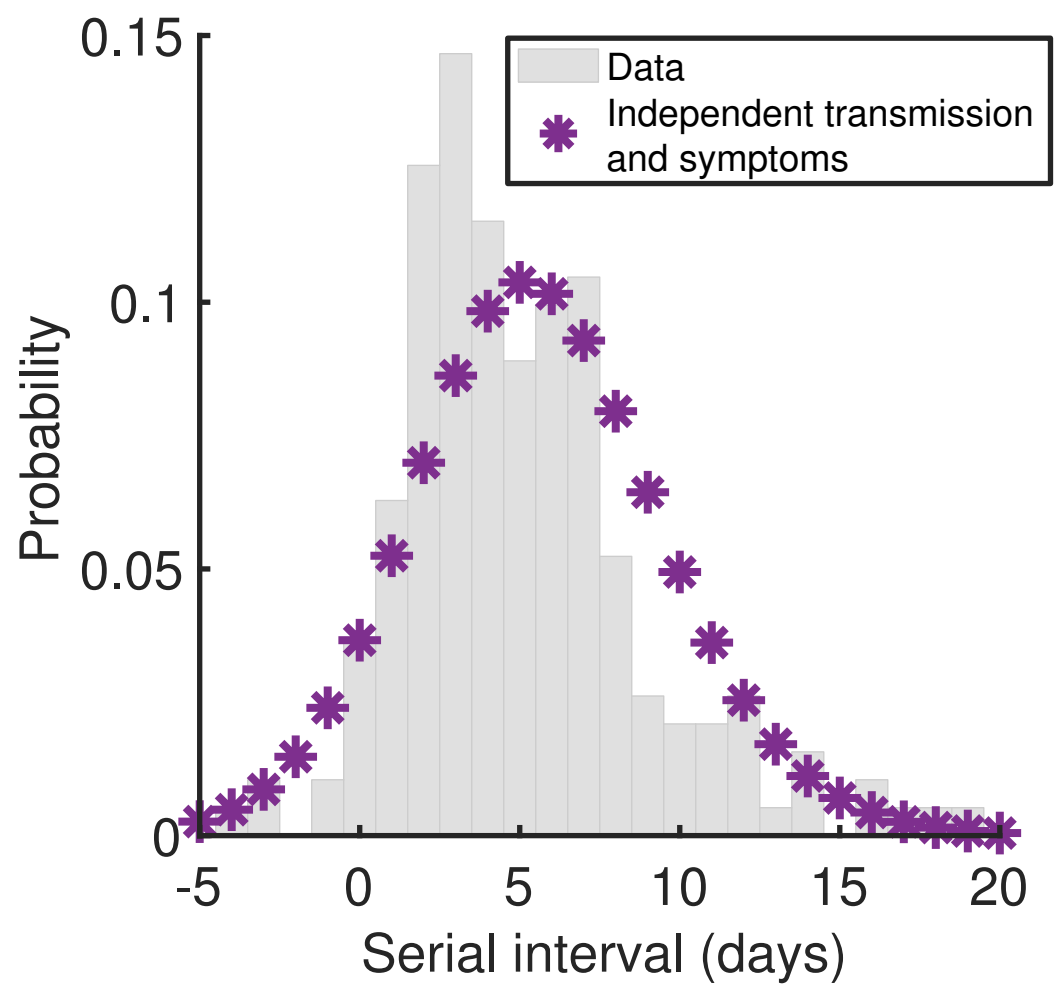

Supplement: supp [file elife-65534-supp-v1.zip]

**A.**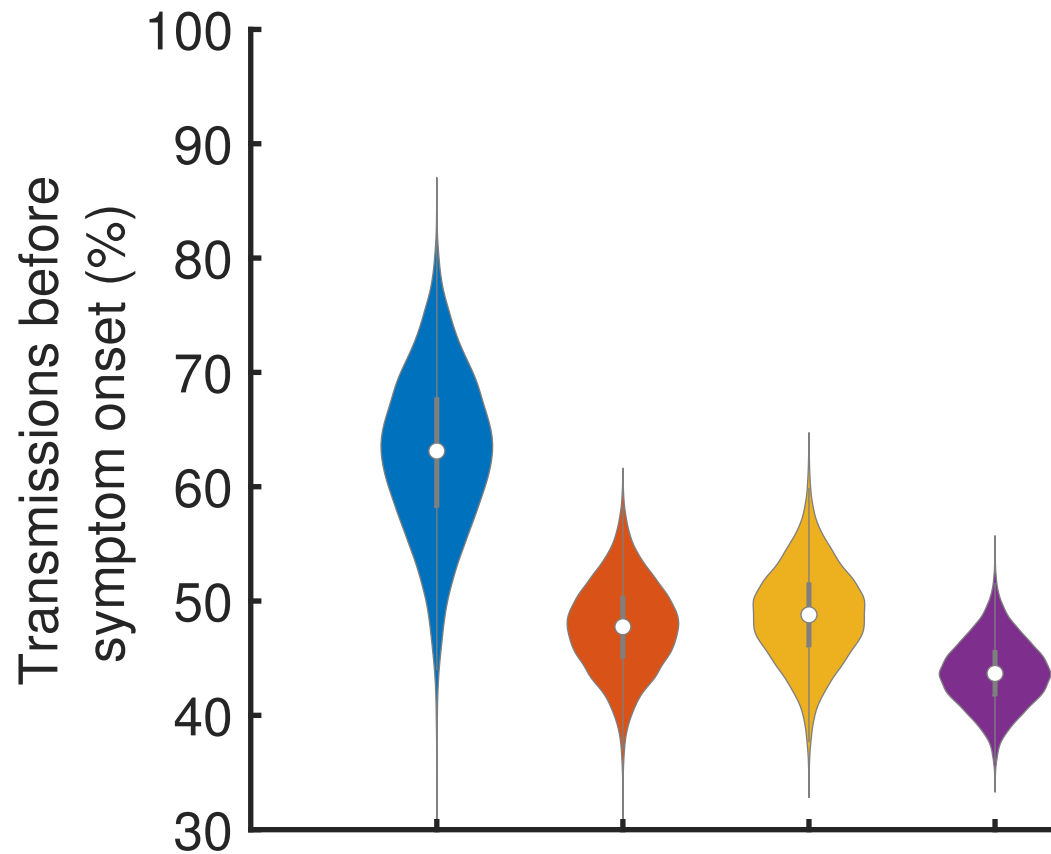**B.**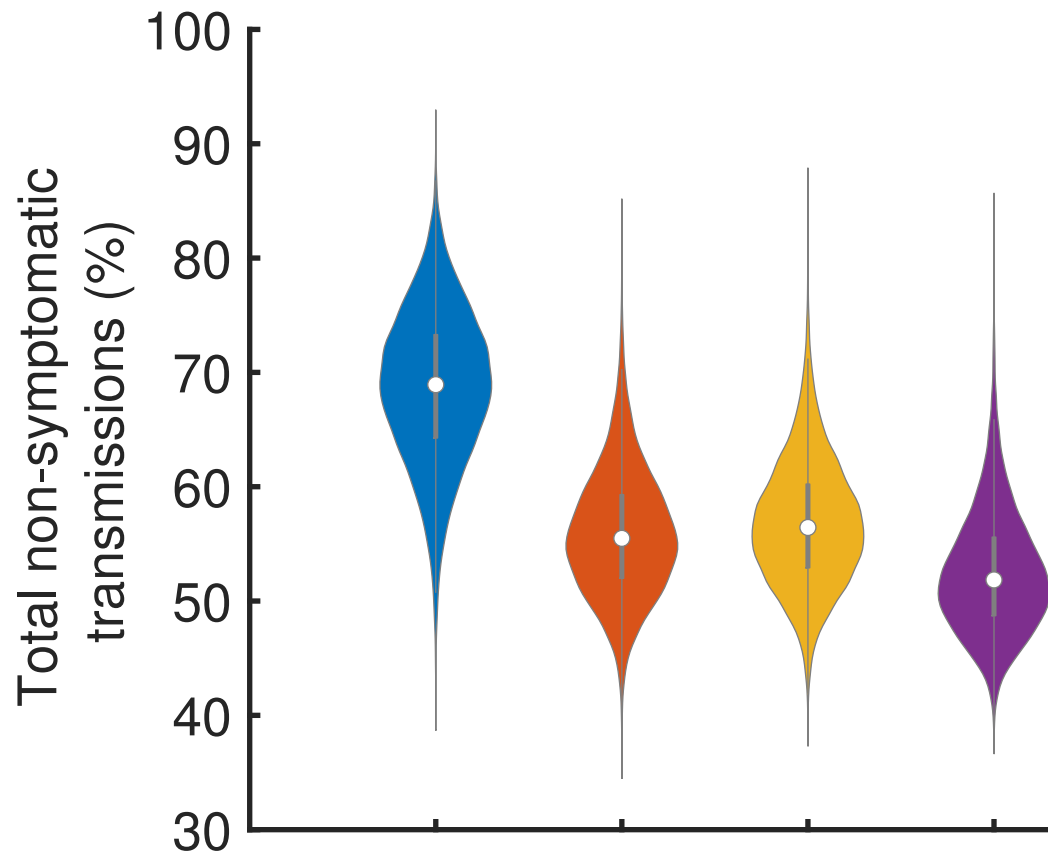

Supplement: supp [file elife-65534-supp-v1.zip]

**A.**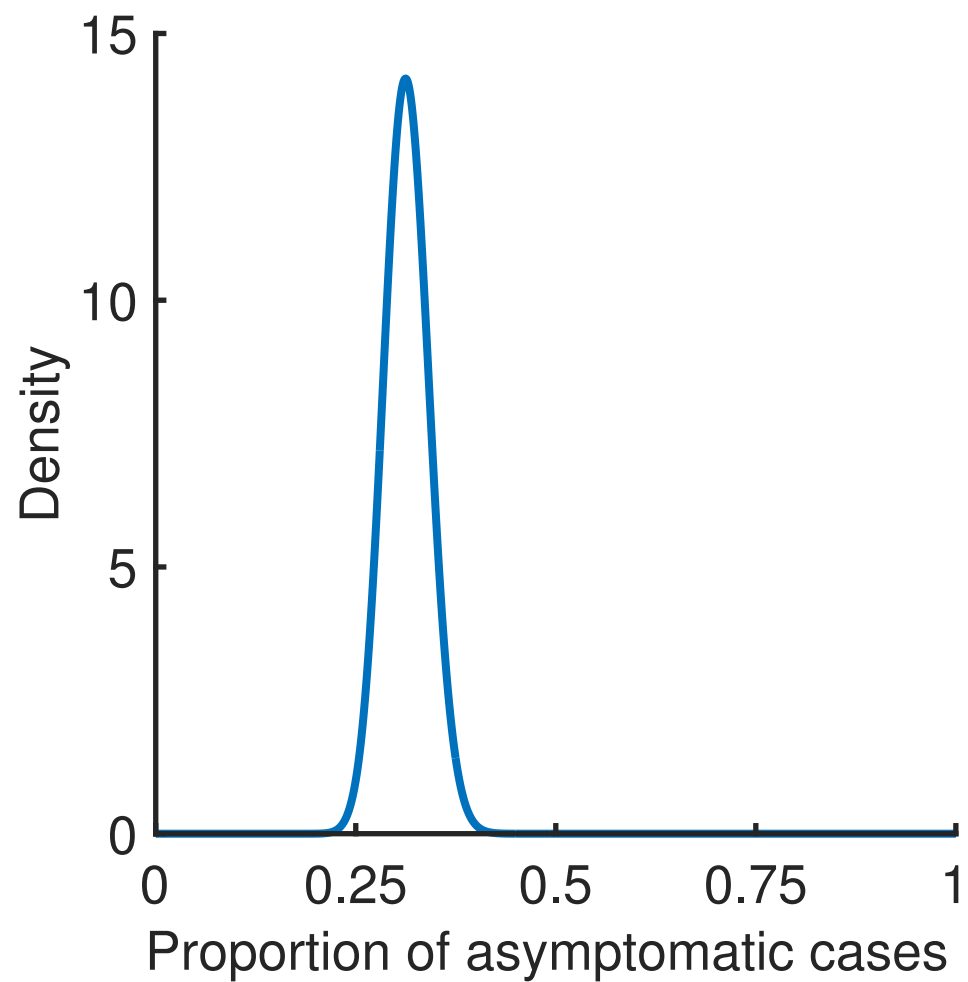**B.**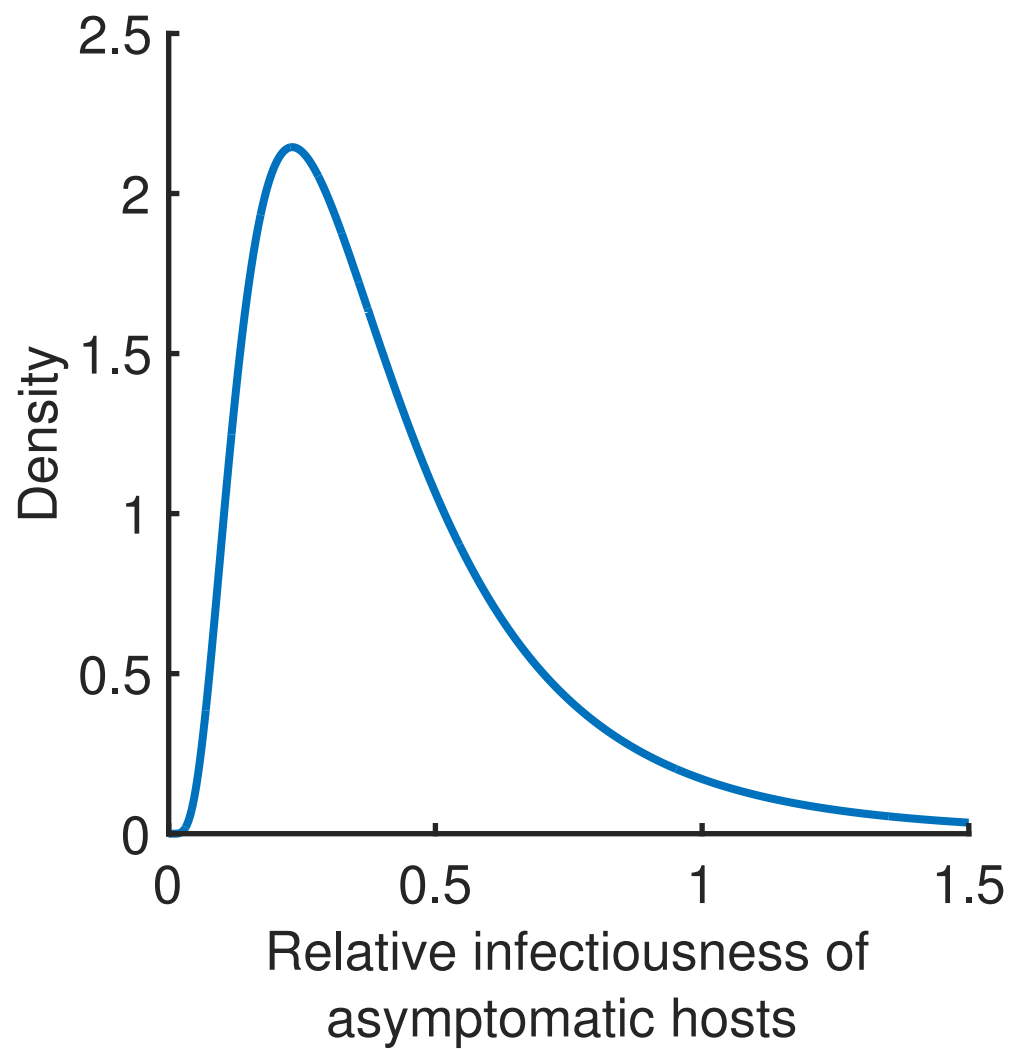

Supplement: supp [file elife-65534-supp-v1.zip]
